# Supplementary material for: Electrically-driven robust tuning of lattice thermal conductivity
Source: Royal Society of Chemistry journal article supplement (doi:10.1039/d2cp01117d), 2022-01-01
Supplement: d2cp01117d1.pdf [file d2cp01117d1.pdf]

# Electrically driven robust tuning of lattice thermal conductivity

E Zhou<sup>1, †</sup>, Donghai Wei<sup>1, †</sup>, Jing Wu<sup>1</sup>, Guangzhao Qin,<sup>1, \*</sup> and Ming Hu<sup>2, \*</sup>

<sup>1</sup>*State Key Laboratory of Advanced Design and Manufacturing for Vehicle Body, College of Mechanical and Vehicle Engineering, Hunan University, Changsha 410082, P. R. China*

<sup>2</sup>*Department of Mechanical Engineering, University of South Carolina, Columbia, SC 29208, USA*

† These authors contributed equally.

\* Corresponding authors: G.Q. <[gzqin@hnu.edu.cn](mailto:gzqin@hnu.edu.cn)>, M.H. <[hu@sc.edu](mailto:hu@sc.edu)>

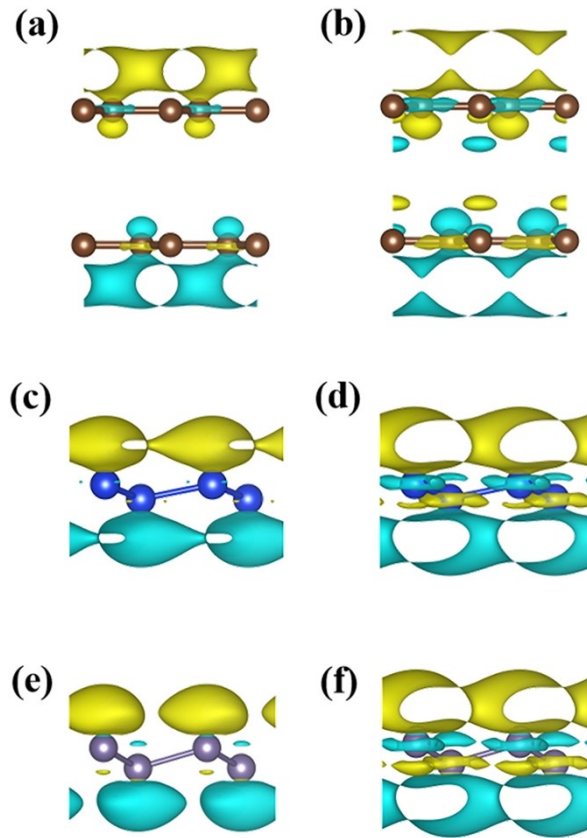

Supplemental Fig. S1 The difference in charge density under typical electric field in 0.05 (a,c,e) and 0.1 eV/Å (b,d,f) for bilayer graphene (a, b), silicene (c, d), germanene (e, f). ( $\Delta\rho = \rho(E_z) - \rho(E_z = 0)$ ) (yellow: positive accumulation of charge, blue: negative depletion of charge). The isosurface is set at  $2 \times 10^{-5}$ .

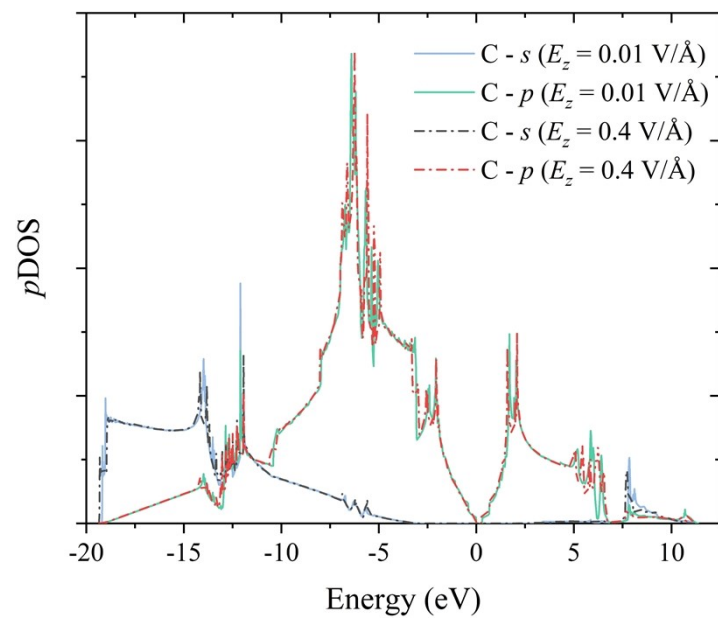

Supplemental Fig. S2 The projected density of states (*p*DOS) of C atoms with external electric field in bilayer graphene.

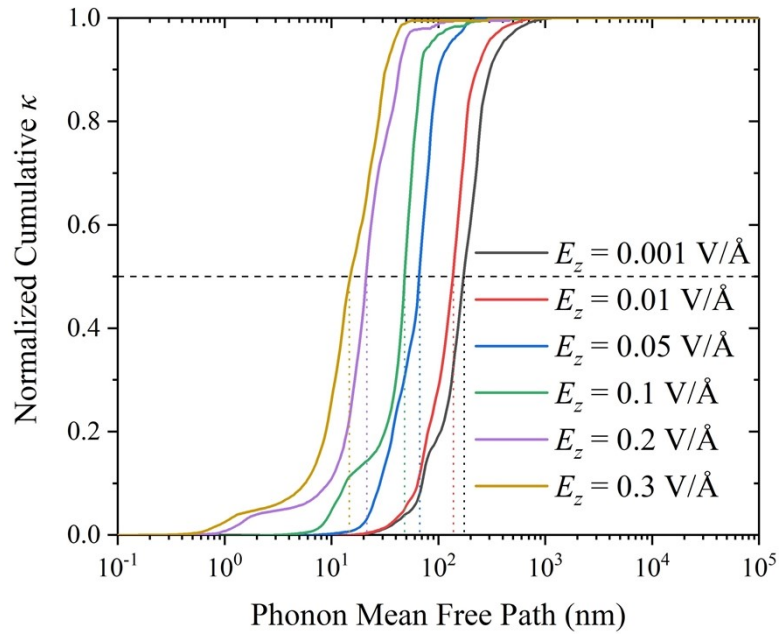

Supplemental Fig. S3 The normalized cumulative  $\kappa$  with respect to the phonon mean free path (MFP) for AB stacking bilayer graphene.
